# Supplementary material
Source: PubMed Central journal article supplement (PMC4026074)
Supplement: cbt-15-516-s01.pdf [file cbt-15-516-s01.pdf]

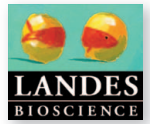

## **Supplemental Material to:**

**Tao Chen, Li-Qing Yao, Qiang Shi, Zhong Ren, Le-Chi Ye,  
Jian-Min Xu, Ping-Hong Zhou, and Yun-Shi Zhong**

**MicroRNA-31 contributes to colorectal cancer  
development by targeting factor inhibiting HIF-1 $\alpha$  (FIH-1)**

**Cancer Biology & Therapy 2014; 15(5)**

**<http://dx.doi.org/10.4161/cbt.28017>**

**<http://www.landesbioscience.com/journals/cbt/article/28017/>**

**Table S1.** Summary of colorectal cancer patients' characteristics.

|                               |       |
|-------------------------------|-------|
| Number of patients            | 66    |
| <i>Age (y)</i>                |       |
| Median                        | 63    |
| Range                         | 25–88 |
| <i>Gender</i>                 |       |
| Male                          | 43    |
| Female                        | 23    |
| <i>Localization</i>           |       |
| Right colon                   | 18    |
| Left colon                    | 22    |
| Rectum                        | 26    |
| <i>Histological grade</i>     |       |
| Well-differentiated           | 43    |
| Poorly differentiated         | 23    |
| <i>Tumor staging</i>          |       |
| pTNM I–II                     | 39    |
| pTNM III–IV                   | 27    |
| <i>Tumor and depth</i>        |       |
| 1–2                           | 11    |
| 3–4                           | 55    |
| <i>Lymph-node involvement</i> |       |
| No                            | 41    |
| Yes                           | 25    |
| <i>Metastasis</i>             |       |
| No                            | 58    |
| Yes                           | 8     |

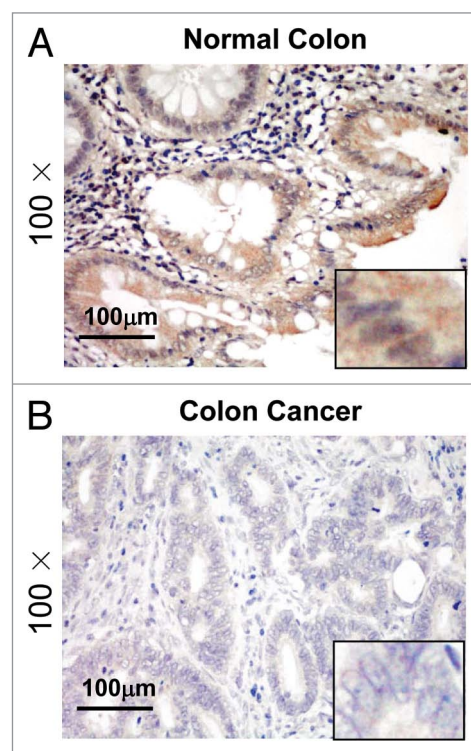

**Figure S1.** FIH-1 expression in normal colon tissue and colon cancer tissue by IHC. (A) FIH-1 expression in normal colon tissue. (B) FIH-1 expression in colon cancer tissue.
